# Supplementary material for: Quantitative Analysis of Immune Response and Erythropoiesis during Rodent Malarial Infection
Source: PubMed Central journal article supplement (PMC2947982; doi:10.1371/journal.pcbi.1000946), 2010-09-30
Supplement: pcbi.1000946.s004.pdf [file pcbi.1000946.s004.pdf]

**Table S2.** Bayes' factors for models  $\Pi_9$  to  $\Pi_{15}$  relative to model  $\Pi_0$ .

| Treatment        | Mouse | $\Pi_9$ | $\Pi_{10}$ | $\Pi_{11}$ | $\Pi_{12}$ | $\Pi_{13}$ | $\Pi_{14}$ | $\Pi_{15}$ |
|------------------|-------|---------|------------|------------|------------|------------|------------|------------|
| Reconstituted AJ | 1     | -1.9    | 674.0      | -0.3       | 3.7        | 1.4        | 3.1        | 0.4        |
|                  | 2     | -3.6    | 706.4      | -2.5       | -7.9       | -11.1      | -3.9       | 1.0        |
|                  | 3     | 5.8     | 482.7      | -1.3       | 17.2       | 26.8       | 11.0       | -0.5       |
|                  | 4     | 0.2     | 426.8      | -0.5       | 3.3        | 2.7        | 9.5        | 0.6        |
|                  | 5     | 5.4     | 395.9      | -0.2       | 9.2        | 32.1       | 13.5       | -0.9       |
|                  | 6     | -2.7    | 664.7      | -1.2       | -7.3       | -8.3       | 4.6        | 0.8        |
| Reconstituted AS | 1     | 0.0     | 204.6      | 0.5        | 0.3        | 2.9        | 8.1        | 0.3        |
|                  | 2     | 3.1     | 94.8       | -0.1       | -0.3       | 3.7        | 7.4        | -1.5       |
|                  | 3     | 7.9     | 187.8      | 0.2        | -5.6       | -5.4       | 12.6       | -1.1       |
|                  | 4     | 5.6     | 80.9       | 0.1        | -3.0       | -2.5       | 5.4        | -0.3       |
|                  | 5     | 3.5     | 358.9      | -0.2       | 3.2        | 3.1        | 7.1        | -0.7       |
|                  | 6     | 1.4     | 566.3      | -1.9       | 5.9        | 6.4        | 6.2        | -3.2       |
| Nude AJ          | 1     | 1.4     | 222.1      | -1.8       | -2.6       | -4.7       | 2.8        | -0.6       |
|                  | 2     | -0.7    | 0.8        | 0.4        | 0.0        | 0.2        | 5.4        | -0.1       |
|                  | 3     | -0.4    | 3.4        | -1.0       | -3.6       | -5.4       | 8.3        | -0.1       |
|                  | 4     | 1.3     | 341.4      | -0.9       | -0.9       | -1.0       | 5.3        | -1.0       |
|                  | 5     | 1.1     | 2.2        | -0.4       | -1.8       | -1.3       | 7.3        | -0.1       |
|                  | 6     | -0.1    | 263.9      | 1.2        | -2.6       | -4.3       | 3.8        | 2.1        |
|                  | 7     | 0.0     | 3.6        | 0.4        | -3.2       | -4.8       | 11.7       | -0.5       |
| Nude AS          | 1     | 0.2     | 2.4        | -0.2       | -6.7       | -7.5       | 3.8        | -0.5       |
|                  | 2     | 1.0     | 21.7       | -1.6       | -3.4       | -4.6       | 2.8        | 0.2        |
|                  | 3     | 3.9     | 42.1       | -2.0       | 1.4        | 3.6        | 6.0        | -2.0       |
|                  | 4     | 1.2     | 9.5        | -1.3       | -0.9       | -1.6       | 8.5        | -1.6       |
|                  | 5     | 1.0     | 6.5        | -0.7       | -6.3       | -7.9       | 5.4        | 0.1        |
|                  | 6     | 0.0     | -1.6       | -0.4       | -3.5       | -4.9       | 5.9        | 0.3        |
|                  | 7     | 2.3     | 11.8       | -0.6       | -2.1       | -3.7       | 7.2        | -1.8       |
| Wildtype AJ      | 1     | -1.9    | 336.8      | 2.1        | -8.8       | -8.6       | 2.0        | 0.9        |
|                  | 2     | -0.7    | 301.7      | -2.0       | -2.2       | -3.2       | 10.3       | 0.7        |
|                  | 3     | -0.7    | 344.7      | 2.8        | 8.8        | 28.4       | 6.0        | 0.3        |
|                  | 4     | -1.2    | 371.2      | -0.5       | -9.0       | -9.6       | 2.0        | 1.2        |
|                  | 5     | 0.2     | 280.7      | 1.2        | 8.4        | 21.2       | 3.9        | 0.7        |
|                  | 6     | -0.5    | 488.2      | -1.8       | -2.1       | -3.3       | 7.7        | 2.3        |
| Wildtype AS      | 1     | -1.6    | 230.1      | -0.9       | -8.2       | -9.3       | 0.4        | 0.2        |
|                  | 2     | -1.2    | 204.8      | -1.3       | -4.1       | -1.7       | 5.2        | -1.4       |
|                  | 3     | 0.3     | 177.2      | 3.6        | -9.2       | -2.2       | 5.7        | 0.6        |
|                  | 4     | 0.2     | 269.4      | 1.3        | 1.3        | 8.5        | 6.4        | 1.1        |
|                  | 5     | 8.8     | 169.6      | 14.3       | 6.7        | 42.7       | 0.3        | -0.4       |
|                  | 6     | -1.4    | 178.8      | 4.7        | -7.9       | 5.6        | 3.0        | -1.7       |
